1 **FKBPL and FKBP8 regulate DLK degradation and neuronal responses to axon injury**

2

3 **Bohm Lee<sup>1</sup>, Yeonsoo Oh<sup>1</sup>, Eunhye Cho<sup>1</sup>, Aaron DiAntonio<sup>2</sup>, Valeria Cavalli<sup>3</sup>, Jung Eun**  
4 **Shin<sup>4,5</sup> and Yongcheol Cho<sup>1\*</sup>**

5

6 <sup>1</sup> Department of Life Sciences, Korea University, Seoul 02841, Republic of Korea.

7 <sup>2</sup> Department of Developmental Biology, Washington University School of Medicine in Saint

8 Louis, St. Louis, MO, USA; Needleman Center for Neurometabolism and Axonal Therapeutics,

9 Washington University School of Medicine in Saint Louis, St. Louis, MO, USA.

10 <sup>3</sup> Department of Neuroscience, Washington University School of Medicine, St. Louis, MO 63110,

11 USA; Center of Regenerative Medicine, Washington University School of Medicine, St. Louis,

12 MO 63110, USA; Hope Center for Neurological Disorders, Washington University School of

13 Medicine, St. Louis, MO 63110, USA

14 <sup>4</sup> Department of Molecular Neuroscience, Dong-A University College of Medicine, Busan 49201,

15 Republic of Korea

16 <sup>5</sup> Department of Translational Biomedical Sciences, Graduate School of Dong-A University,

17 Busan 49201, Republic of Korea

18

19 \*Correspondence to **Yongcheol Cho** ([ycho77@korea.ac.kr](mailto:ycho77@korea.ac.kr))

20

21

22

23 **Abstract**

24 DLK is a key regulator of axon regeneration and degeneration in response to neuronal injury.  
25 To understand the molecular mechanisms controlling the DLK function, we performed yeast two-hybrid  
26 screening analysis and identified FKBPL as a DLK-binding protein that bound to the kinase domain and  
27 inhibited the kinase enzymatic activity of DLK. FKBPL regulated DLK stability through ubiquitin-  
28 dependent DLK degradation. We tested other members in the FKBP protein family and found that  
29 FKBP8 also induced DLK degradation as FKBPL did. We found that Lysine 271 residue in the kinase  
30 domain of DLK was a major site of ubiquitination and SUMO3-conjugation and responsible for FKBP8-  
31 mediated degradation. In vivo overexpression of FKBP8 delayed progression of axon degeneration and  
32 neuronal death following axotomy in sciatic and optic nerves, respectively, although axon regeneration  
33 efficiency was not enhanced. This research identified FKBPL and FKBP8 as new DLK-interacting  
34 proteins that regulated DLK stability by MG-132 or bafilomycin A1-sensitive protein degradation.

35

36 **Keywords:**

37 DLK, FKBPL, FKBP8, autophagy, axon degeneration

38

## 39 Introduction

40 Dual leucine zipper kinase (DLK), an upstream MAP triple kinase, is a key regulator of  
41 neuronal damage responses playing a major role in axon regeneration and degeneration (Holland *et al*,  
42 2016b; Welsbie *et al*, 2018). DLK regulates the JNK signaling pathway when neurons are under stress  
43 conditions and is essential for injury-induced retrograde signaling that induces injury-responsive  
44 differential gene expression (Shin *et al*, 2012a, 2019). DLK is also required for axon degeneration  
45 because genetic depletion of DLK impairs axon degeneration (Miller *et al*, 2009). Therefore, finding  
46 molecular regulators of DLK and understanding their regulatory mechanisms are required for better  
47 understanding axon regeneration and degeneration.

48 Protein degradation pathways are a core axis regulating neuronal responses to a diverse  
49 range of stresses (Nakata *et al*, 2005; Collins *et al*, 2006). Since DLK is a key regulator of  
50 neurodegenerative signal transduction, the post-translational modification of DLK has been studied  
51 intensively to understand the mechanisms balancing DLK activity, localization, and protein levels  
52 (Huntwork-Rodriguez *et al*, 2013; Watkins *et al*, 2013; Larhammar *et al*, 2017; Holland *et al*, 2016).  
53 Modifications such as phosphorylation and palmitoylation are essential for the regulation of DLK  
54 functions and stability across different cellular contexts (Monterino & Thomas, 2015; Niu *et al*, 2020;  
55 Martin *et al*, 2019). DLK protein levels are modulated by stress signaling through the PHR1 E3 ubiquitin  
56 ligase and the de-ubiquitinating enzyme USP9X, which is a key pathway determining neuronal fates  
57 after injury (Babetto *et al*, 2013; Larhammar *et al*, 2017; Watkins *et al*, 2013; Huntwork-Rodriguez *et al*,  
58 2013). Therefore, identifying the molecular mechanism controlling DLK stability with its interaction of  
59 DLK-regulating proteins is required to understand the DLK-mediated signal pathway.

60 In the present study, we report that FKBPL was a new DLK-binding protein identified by yeast  
61 two-hybrid screening. FKBPL is a member of the FK506-binding protein (FKBP) family of immunophilins,  
62 the group of the conserved proteins binding with immunosuppressive drugs, such as FK506, rapamycin  
63 and cyclosporin A. FKBPL bound to the kinase domain of DLK and inhibited its kinase activity. FKBPL  
64 induced DLK degradation by ubiquitin-dependent pathway. Comparative analysis showed that another  
65 FKBP member, FKBP8, also bound to DLK and induced DLK degradation as FKBPL did. We found that  
66 the lysine residue at position 271 in the kinase domain was a target site for DLK ubiquitination that was  
67 responsible for MG-132 and bafilomycin A1-sensitive DLK degradation. The lysine residue also served  
68 as SUMO3-conjugating site, implying that the evolutionarily conserved lysine residue in the kinase

69 domain was a potential site for regulating DLK functions. FKBP8 promoted lysosomal degradation of  
70 ubiquitinated DLK, while a K271R mutant form of DLK was resistant to FKBP8-mediated DLK  
71 degradation. In vivo overexpression of FKBP8 delayed axon degeneration in sciatic nerves after  
72 axotomy and exhibited a protective effect in retinal ganglion cells after optic nerve crush.

73 Because DLK mediates retrograde signals to the nucleus to determine neuronal fates for  
74 regeneration or apoptosis after axonal injury (Shin *et al*, 2012a; Watkins *et al*, 2013), identifying proteins  
75 regulating DLK protein levels are important for understanding mechanisms of DLK-regulated axon  
76 regeneration or DLK-induced neuronal death. Here, we present new DLK-interacting molecules, FKBPL  
77 and FKBP8, that regulate DLK degradation by ubiquitin-dependent lysosomal pathway.

78

79 **Results**

80 **FKBPL was identified as a DLK-binding protein**

81 To identify DLK-interacting proteins, we performed yeast two-hybrid screening analysis and  
82 found *Fkbpl*, *Tedc2*, and *Tuft1* as potential candidates. By analyzing two independent reporter systems,  
83 we confirmed the *Fkbpl* gene product as the protein that is most stably bound to DLK (Figures 1A and  
84 1B). FKBPL is a member of FK506-binding proteins (FKBPs), a family of proteins that bind to tacrolimus  
85 (FK506), an immunosuppressant molecule, and have prolyl isomerase activity (Siekierka *et al*, 1989).  
86 The co-immunoprecipitation assay validated the screening result and showed that exogenously  
87 expressed DLK and FKBPL in HEK293T cells were stably associated (Figure 1C).

88 To map the region responsible for the interaction, FKBPL-deletion mutants were subjected to  
89 co-immunoprecipitation analysis. The deletion of the N-terminal part of FKBPL, including the  
90 peptidylprolyl isomerase (PPI) domain, impaired the interaction between DLK and FKBPL (Figure 1D).  
91 In addition, the N-terminal region of DLK, including the kinase domain, mediated the interaction because  
92 a partial form of DLK with its N-terminal region intact was still able to bind to FKBPL (Figure 1E). These  
93 results indicated that the N-terminal regions of both proteins were responsible for their interaction.  
94 Because the PPI and the kinase domains formed a stable association, they served as the interface for  
95 their interaction (Figure 2F). The yeast two-hybrid screening and the co-immunoprecipitation analyses  
96 revealed that FKBPL was a new binding partner of DLK and their interaction was mediated by the PPI  
97 domain of FKBPL and the kinase domain of DLK.

98

99 **Figure 1**

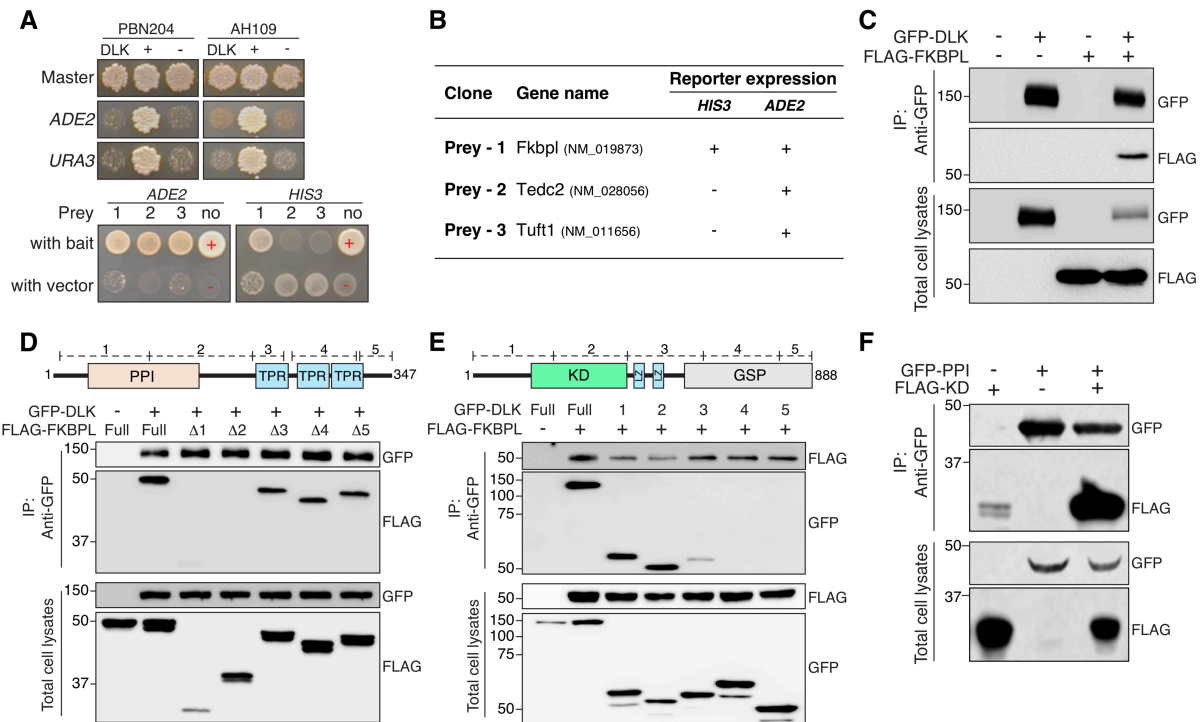

100

101

102 **Figure 1. The PPI domain of FKBPL and the kinase domain of DLK are responsible for their**

103 **interaction.** (A) Yeast two-hybrid screening analysis was performed to identify DLK-interacting proteins

104 in two different yeast strains PBN204 and AH109. Master plates indicated the positive controls for the

105 selection. *ADE2* and *URA3* indicated -Ade and -Ura minimal medium. It validated that DLK itself did not

106 activate *ADE2* nor *URA3* genes (Top). The *ADE2*-selection screening identified three preys (1, *Fkbp1*;

107 2, *Tedc2*; 3, *Tuft1*). *ADE2*- minimal medium selection with an additional selection of *HIS3*- showed that

108 prey 1 survived and made the colony. Red + indicated the positive control identical with the top panel.

109 (B) The *Fkbp1* gene product exhibits the most stable association with DLK of the three potential

110 candidates by two reporter-analysis systems. (C) Western blot analysis of the co-immunoprecipitation

111 of DLK and FKBPL in HEK293T cells. GFP-DLK and FLAG-FKBPL were co-transfected to HEK293T

112 cells. The protein lysates were immunoprecipitated using an anti-GFP antibody followed by SDS-PAGE

113 analysis. (D) Schematic diagram of the protein domains of FKBPL and western blot analysis for the co-

114 immunoprecipitation analysis of DLK with FKBPL-deletion mutants (PPI; peptidylprolyl isomerase

115 domain, TPR; tetratricopeptide repeat domain). Anti-GFP antibody was used for immunoprecipitation.

116 (E) Schematic diagram of the protein domains of DLK and western blot analysis for the co-

117 immunoprecipitation analysis of FKBPL with partial DLK proteins (KD; kinase domain, LZ; leucine zipper

118 motif, GSP; Gly, Ser, and Pro-rich domain). Anti-GFP antibody was used for immunoprecipitation. (F)  
119 Western blot analysis for the co-immunoprecipitation of the PPI domain and KD. Anti-GFP antibody was  
120 used for immunoprecipitation.  
121

122 **FKBPL inhibited the kinase activity of DLK and induced degradation**

123           Since FKBPL interacted with DLK via its kinase domain, we performed in vitro kinase assay to  
124 investigate whether DLK kinase activity was modulated by its association with FKBPL (Holland *et al*,  
125 2016) (Figure 2A). Incubating the DLK substrate GST-MKK4 with immunopurified GFP-DLK induced  
126 phosphorylation of GST-MKK4 in vitro (Figure 2B). However, MKK4 phosphorylation was significantly  
127 reduced when GST-MKK4 was incubated with immunopurified GFP-DLK associated with FLAG-FKBPL  
128 (Figures 2B and 2C), indicating that the association of DLK and FKBPL inhibited the DLK kinase activity.  
129 As FKBPL bound to the kinase domain of DLK, the association of FKBPL might physically block the  
130 interaction of its substrate to the kinase domain.

131           DLK kinase activity was required for its stabilization and introducing mutations impairing the  
132 kinase activity caused destabilization of DLK at the protein level (Huntwork-Rodriguez *et al*, 2013).  
133 Since FKBPL bound to DLK and inhibited its kinase activity, we tested the protein level of DLK with  
134 FKBPL co-expression and found that the DLK protein level was significantly lowered when FKBPL was  
135 co-expressed in HEK293T cells (Figure 2D). However, the FKBPL-mediated DLK reduction was not  
136 prevented by applying an inhibitor of enzymatic activity of a broad spectrum of serine proteases,  
137 cysteine proteases, metalloproteases, and calpains (Figure 2D). In addition, an inhibitor of caspases  
138 had no effect on preventing the DLK reduction (Figure 2E). Therefore, the direct cleavages from  
139 proteases might not be responsible for the FKBPL-induced DLK degradation. These results showed  
140 that FKBPL was a negative regulator of DLK and inhibited DLK kinase activity.

141



142 **Figure 2**

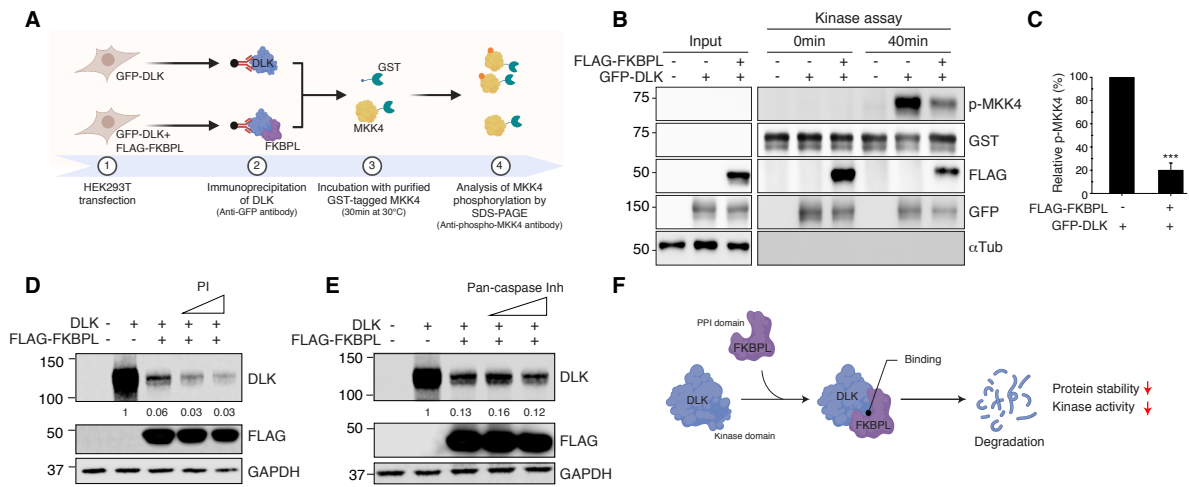

143

144 **Figure 2. FKBPL inhibited the kinase activity of DLK and lowered the DLK protein level. (A)**

145 Illustration of DLK in vitro kinase assay. GFP-DLK was expressed from HEK293T cells with or without

146 FKBPL co-expression. Immunopurified GFP-DLK was incubated in the reaction buffer including the

147 substrate of purified GST-MKK4. (B) Western blot analysis for in vitro kinase assays. Phosphorylated

148 MKK4 level was visualized by anti-phospho-MKK4 antibody. Anti-GST, FLAG, GFP antibody was used

149 for detecting GST-MKK4, FLAG-FKBPL, and GFP-DLK protein domain from input and kinase reaction samples.

150 Anti-α-tubulin antibody was used for the internal control. (C) Quantification of the relative p-MKK4 from

151 (A) (n=3 for each condition; \*\*\*p<0.001 by t-test; mean ± S.E.M.). (D and E) Western blot analysis for

152 GFP-DLK and FLAG-FKBPL protein level with protease inhibitor (PI) (D) or pan-caspase inhibitor (Pan-

153 caspase Inh) (E) treatment at different doses. (F) Proposed model of the interaction between DLK and

154 FKBPL.

155

## 156 **FKBPL and FKBP8 induced lysosomal DLK degradation**

157           FKBPs are a group of proteins containing an FK506-binding domain and a peptidylprolyl  
158 isomerase (PPI) domain (Ghartey-Kwansah *et al*, 2018; Heitman *et al*, 1992; Kang *et al*, 2008; Schmid  
159 *et al*, 1993). Since FKBP family shares similar structures with high sequence homology (Tong & Jiang,  
160 2015), we expanded the analysis to other FKBP proteins to test the reduction of DLK protein levels.  
161 Considering the DLK functions regulating axon regeneration and degeneration in dorsal root ganglion  
162 neurons, we reviewed the abundance of FKBP's mRNA in mouse L4,5 DRG tissues and mouse sciatic  
163 nerves from our previously published datasets (Shin *et al*, 2019; Shin *et al*, 2018a; Lee *et al*, 2021). To  
164 consider the neuronal expression of the FKBP's, the microarray dataset from cultured mouse embryonic  
165 DRG neurons was presented as the relative sizes of the circles (Figure 3A). The analysis showed that  
166 the mRNA levels of FKBP4, FKBP8 and FKBP12 were relatively higher than the others from adult  
167 mouse DRGs and sciatic nerves (Figure 3A). In addition, the neuronal expression profiles of FKBP  
168 mRNAs showed that FKBP4, -8 and -12 were relatively higher than the others, which was analyzed  
169 from the cultured embryonic DRG neurons without non-neuronal cells (Cho *et al*, 2013). This analysis  
170 implied that FKBP4, -8 and 12 were the potential candidates of the DLK-regulating FKBP's in sensory  
171 neurons.

172           Next, we tested DLK destabilization with co-expression of the FKBP's. FKBPL co-expression  
173 in HEK293T cells lowered DLK protein level to 32% (Figure 3B). The western blot analysis showed that  
174 FKBP8 was the most potent for lowering DLK protein levels similar to FKBPL, whereas FKBP4 had no  
175 significant effect on DLK protein reduction (Figures 3B and 3D). In addition, co-immunoprecipitation  
176 result showed that both human and mouse FKBP8 was associated with DLK, while FKBP4 did not  
177 interact with DLK (Figure 3C).

178           FKBP8 is known to regulate Parkin-independent mitophagy, which involves the removal of  
179 mitochondria via autophagy and lysosomal degradation (Yoo *et al*, 2020; Misaka *et al*, 2018; Lim & Lim,  
180 2017; Bhujabal *et al*, 2017; Kang *et al*, 2008). As FKBP8 bound to DLK and lowered DLK protein levels,  
181 we tested if FKBP8- or FKBPL-induced DLK reduction was mediated by lysosomal degradation. When  
182 HEK293T cells were incubated with bafilomycin A1, FKBPL- and FKBP8-induced DLK degradation was  
183 inhibited indicating that FKBPL- and FKBP8-induced DLK degradation was regulated by lysosomal  
184 protein degradation functions. Moreover, the basal DLK protein level without co-expressing FKBP8 or  
185 FKBPL was increased by bafilomycin A1 treatment, suggesting that the baseline DLK turnover is

186 mediated by lysosomal degradation (Figure 3D). These results showed that DLK protein levels were  
187 regulated by lysosomal functions and FKBPL- and FKBP8-induced DLK protein degradation.

188

189 **Figure 3**

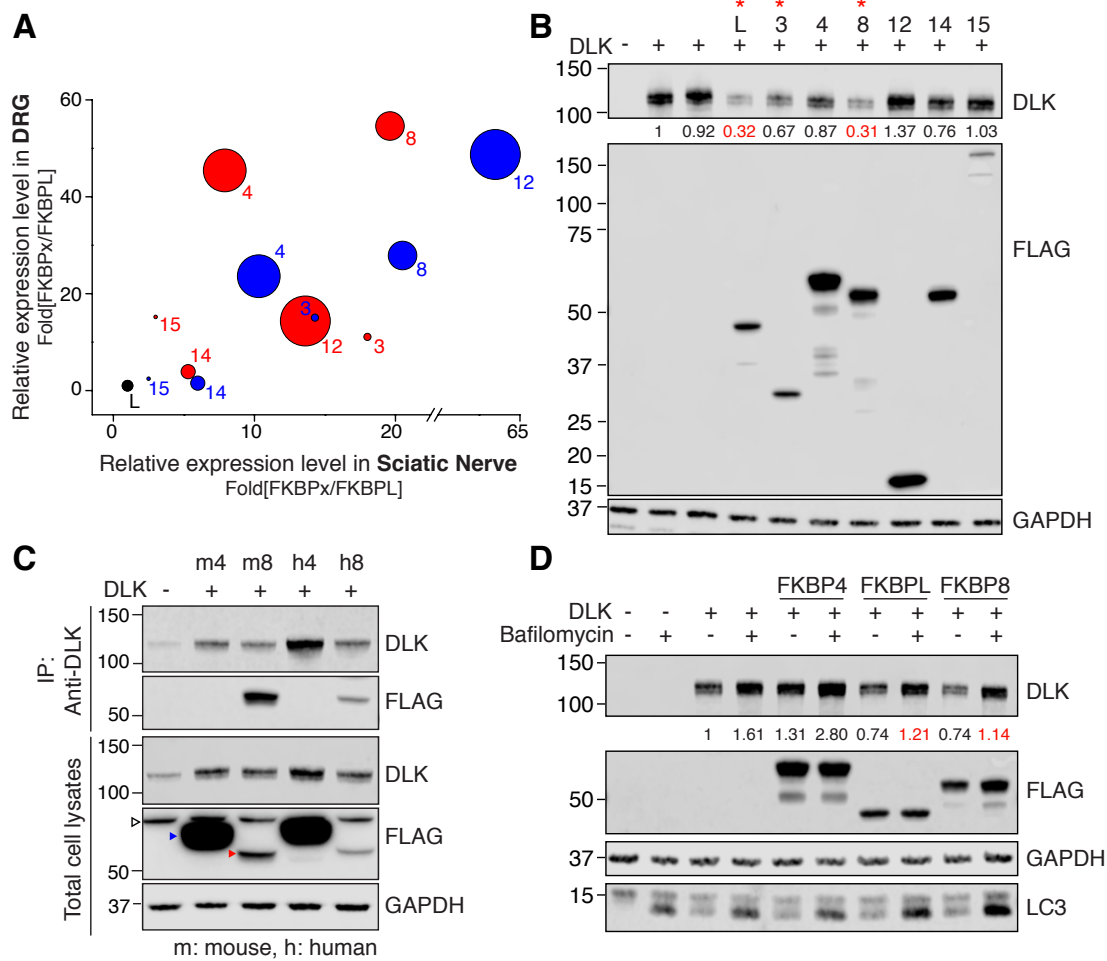

190

191 **Figure 3. FKBPL and FKBP8 induced lysosome-dependent DLK degradation.** (A) Comparative  
 192 analysis of relative expression levels in mouse DRG (Shin *et al*, 2019; Lee *et al*, 2021), sciatic nerve  
 193 tissue (Shin *et al*, 2018b), and cultured embryonic DRG neurons (Cho *et al*, 2013). Red and blue circles  
 194 indicated Illumina short-read sequencing and Nanopore direct RNA long-read sequencing, respectively.  
 195 Circle sizes indicated relative levels of micro array data from cultured embryonic DRG neurons. (B)  
 196 Western blot analysis for the expression of DLK with FKBP4/8. The numbers indicate normalized relative  
 197 intensity. (C) Western blot analysis for the immunoprecipitation of DLK with a mouse (m) and human  
 198 (h) FKBP4/8. Empty arrowhead, non-specific band; blue arrowhead, FKBP4; red arrowhead, FKBP8.  
 199 (D) Western blot analysis for the expression of DLK and FKBP4/8 with or without bafilomycin A1  
 200 treatment. The numbers indicate the normalized relative intensity.

201

## 202 **The kinase domain was a major target of DLK ubiquitination and sumoylation**

203 DLK protein degradation is regulated by PHR1 E3 ligase (Collins *et al*, 2006; Nakata *et al*,  
204 2005). As FKBP1- or FKBP8-induced DLK protein reduction required lysosomal degradation function,  
205 we tested if FKBP8-dependent DLK protein reduction was regulated by the ubiquitin-dependent protein  
206 degradation pathway. First, DLK was subjected to ubiquitination assay, which showed that HA-epitope  
207 tagged ubiquitin proteins were covalently conjugated with DLK protein in HEK293T cells (Figure 4A).  
208 When FKBP8 was co-expressed with DLK, ubiquitinated DLK proteins were significantly reduced, which  
209 was reversed by incubating transfected HEK293T cells with MG-132, an inhibitor of ubiquitin-dependent  
210 protein degradation (Figure 4A). This data indicated that FKBP8-induced DLK degradation via ubiquitin-  
211 dependent protein degradation pathway and FKBP8 overexpression accelerated degradation of  
212 ubiquitinated DLK protein.

213 To identify lysine residues responsible for ubiquitination, we searched the lysine residues in  
214 the kinase domain of DLK because FKBP1 interacted with the DLK kinase domain. The amino acid  
215 sequences alignment showed that DLK kinase domain sequences were evolutionarily conserved with  
216 high homology (Figure 4B). From the aligned lysine residues, we recognized that K271 was followed  
217 by S272, the serine residue known to be phosphorylated by JNK and critical for the DLK kinase activity  
218 because DLK<sup>S272A</sup> mutant had no kinase activity (Huntwork-Rodriguez *et al*, 2013). In addition, S272  
219 residue was one of the top three sites for JNK-dependent phosphorylation of DLK and the only serine  
220 residue in the kinase domain among them (Figure 4C). Moreover, this region was highly conserved  
221 across species (Figure 4B). Therefore, we hypothesized that this region controls DLK protein function,  
222 for example, via regulating its kinase activity and protein stability, and that K271 served as a potential  
223 lysine residue for post-translational modifications, including ubiquitination.

224 To test the residue, DLK<sup>K271R</sup> mutant was subjected to ubiquitination assay, which showed that  
225 substitution of lysine at 271 to arginine significantly reduced the efficiency of ubiquitin conjugation to  
226 DLK<sup>K271R</sup> mutant (Figure 4D). This indicated that the lysine at 271 was a major target site of DLK  
227 ubiquitination. Furthermore, this residue was responsible for DLK SUMOylation because DLK was a  
228 SUMO3-conjugating target protein and only the partial form of DLK including the kinase domain could  
229 be fully SUMOylated (Figures 4E and 4F). However, introducing mutation at K271 to arginine  
230 dramatically impaired SUMO3 conjugation (Figure 4G). These results revealed that the K271 site was  
231 the major ubiquitination target site and the SUMO3-conjugating lysine site.

233 **Figure 4**

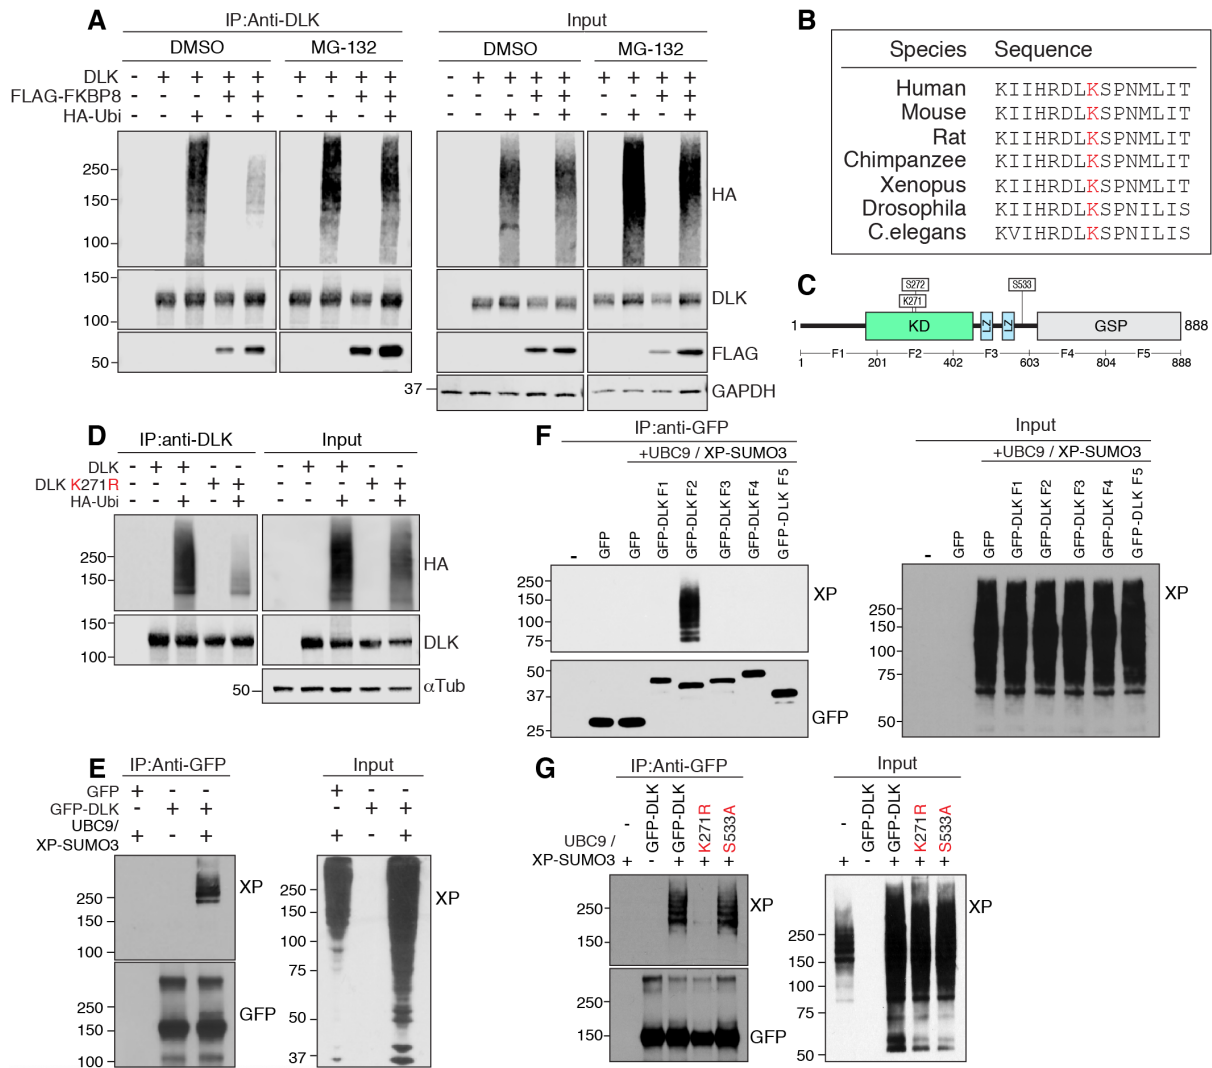

234  
235 **Figure 4. Lysine 271 in the kinase domain is a major target of DLK ubiquitination and**  
236 **sumoylation.** (A) Western blot analysis for immunoprecipitation assays of DLK and HA-ubiquitin (HA-  
237 Ubi) with or without MG-132 treatment. (B) Alignment of amino acid sequences adjacent to the lysine  
238 271 in the kinase domain of DLK in various species (Red; lysine at 271). (C) Schematic diagram of DLK  
239 protein domains (KD; kinase domain, LZ; leucine zipper motif, GSP; Gly, Ser, and Pro-rich domain). (D)  
240 Western blot analysis for immunoprecipitation assays with DLK, a K271R mutant, and HA-ubiquitin (HA-  
241 Ubi). (E) Western blot analysis for SUMO-denaturation immunoprecipitation assays with GFP-DLK,  
242 UBC9, and XP-SUMO3. (F) Western blot analysis for SUMO-denaturation immunoprecipitation assay  
243 with partial DLK proteins. (G) Western blot analysis for SUMO-denaturation immunoprecipitation assays  
244 with DLK, a K271R mutant, and an S533A mutant.

245

246 **FKBP8 mediated ubiquitin-dependent DLK degradation**

247           Because K271 was responsible for DLK ubiquitination, we investigated whether this site was  
248 required for FKBP8-induced DLK degradation. The western blot analysis showed that the DLK<sup>K271R</sup>  
249 mutant was resistant to FKBP8-induced degradation (Figure 5A). Introducing a substitution mutation at  
250 K271 inhibited FKBP8-dependent DLK degradation (Figure 5B). This result indicated that ubiquitinated  
251 DLK at K271 was the major target of the FKBP8-mediated degradation pathway and suggested that  
252 ubiquitinated DLK protein was recruited to FKBP8-mediated protein degradation complex. Notably,  
253 DLK<sup>K271R</sup> displayed a less efficient association with FKBP8, implying that lowering the DLK ubiquitination  
254 efficiency resulted in less interaction with FKBP8 protein and its associated complex (Figure 5C).  
255

256 **Figure 5**

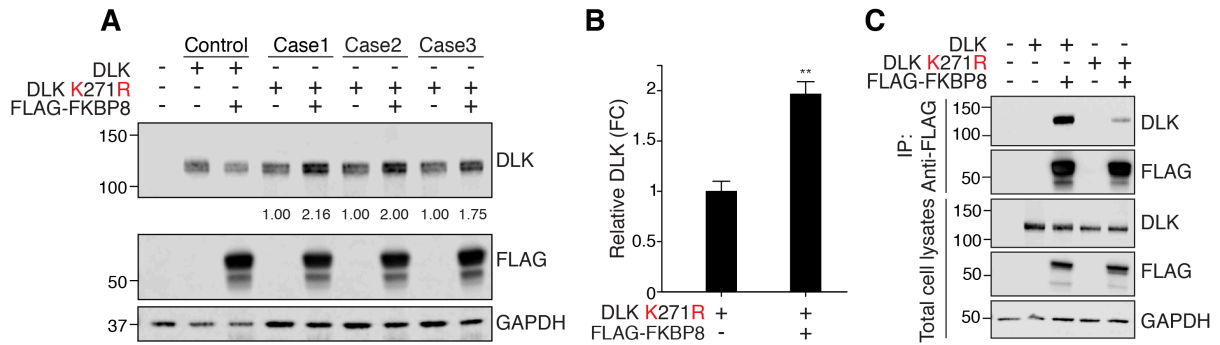

257

258

259 **Figure 5. FKBP8 mediates ubiquitin-dependent DLK degradation.** (A) Western blot analysis for the

260 expression of a K271R mutant with FKBP8. The numbers indicate the normalized relative intensity. (B)

261 Statistical analysis of (A) (n=3 for each condition; \*\*p<0.01 according to a t-test; mean ± S.E.M.). (C)

262 Western blot analysis for immunoprecipitation assays of FKBP8 with DLK and a K271R mutant.



263 **In vivo gene delivery of FKBP8 delayed axon degeneration in mouse sciatic nerve and enhanced**  
264 **the viability of RGC neurons after nerve injury**

265 Because FKBP8 was the interactor of DLK to regulate DLK degradation, we monitored  
266 neuronal injury responses with overexpressing FKBP8 protein in vivo because DLK is a core regulator  
267 of signal transductions for axon regeneration and degeneration. In vivo gene delivery using an adeno-  
268 associated virus (AAV) successfully expressed FKBP8 protein in DRG tissues (Figures 6A, 6B and 6C).  
269 To test axon degeneration in vivo, the mouse sciatic nerve was cut, and the distal part was dissected  
270 at 3 days after axotomy (Figure 6A). Immunohistological analysis showed that FKBP8 overexpression  
271 delayed axon degeneration in sciatic nerves because cross-sectioned sciatic nerves of the distal to the  
272 cut sites had more TUJ1-positive axons in FKBP8-overexpressing mice three days after axotomy  
273 (Figures 6D and 6E). By assessing the number of axonal cross section with TUJ1-positive  
274 immunostaining, control sciatic nerves had an average of  $11.8 \pm 2.4$  intact axons with a diameter of  
275 more than  $5 \mu\text{m}$  per unit area, while sciatic nerves from FKBP8-overexpressing mice had an average  
276 of  $20.0 \pm 3.2$  axons per unit area, a nearly two-fold increase. However, FKBP8-overexpression did not  
277 change the efficiency of axon regeneration in the sciatic nerve. Axon regeneration was assessed by  
278 SCG10 immunostaining the longitudinal sections of sciatic nerves crushed and dissected at 3 days after  
279 injury. SCG10-positive regenerating axons in the sciatic nerves showed no significant difference  
280 between control and FKBP8-overexpressing mice (Figures 6F and 6G). These results implied that  
281 FKBP8-mediated injury responses might be related to degeneration processes more effectively than  
282 regeneration.

283 Because DLK is responsible for retinal ganglion cell (RGC) apoptosis after optic nerve crush  
284 (ONC) injury (Larhammar *et al*, 2017; Huntwork-Rodriguez *et al*, 2013), we tested if FKBP8  
285 overexpression protected against RGC death. Longitudinal sections of mouse retinas were prepared  
286 three days after the ONC injury and immunostained with Brn3a as a marker of RGCs (Figure 6H). We  
287 observed a significant reduction in Brn3a-positive RGCs in the retina with an ONC injury compared to  
288 control mice (Figure 6I). Control mice had an average of  $13.2 \pm 1.0$  Brn3a-positive cells, while the ONC  
289 injury reduced this to  $6.2 \pm 0.6$  per unit area. However, the FKBP8-overexpressing mice had an average  
290 of  $12.4 \pm 0.8$  at three days after the optic nerve injury (Figure 6J). These results showed that injury-  
291 induced retrograde signaling responsible for RGC death after optic nerve crush was downregulated by

292 FKBP8 overexpression. Altogether, FKBP8 might be a potential target for understanding injury-related

293 axon degeneration and neuronal death.

294

295 **Figure 6**

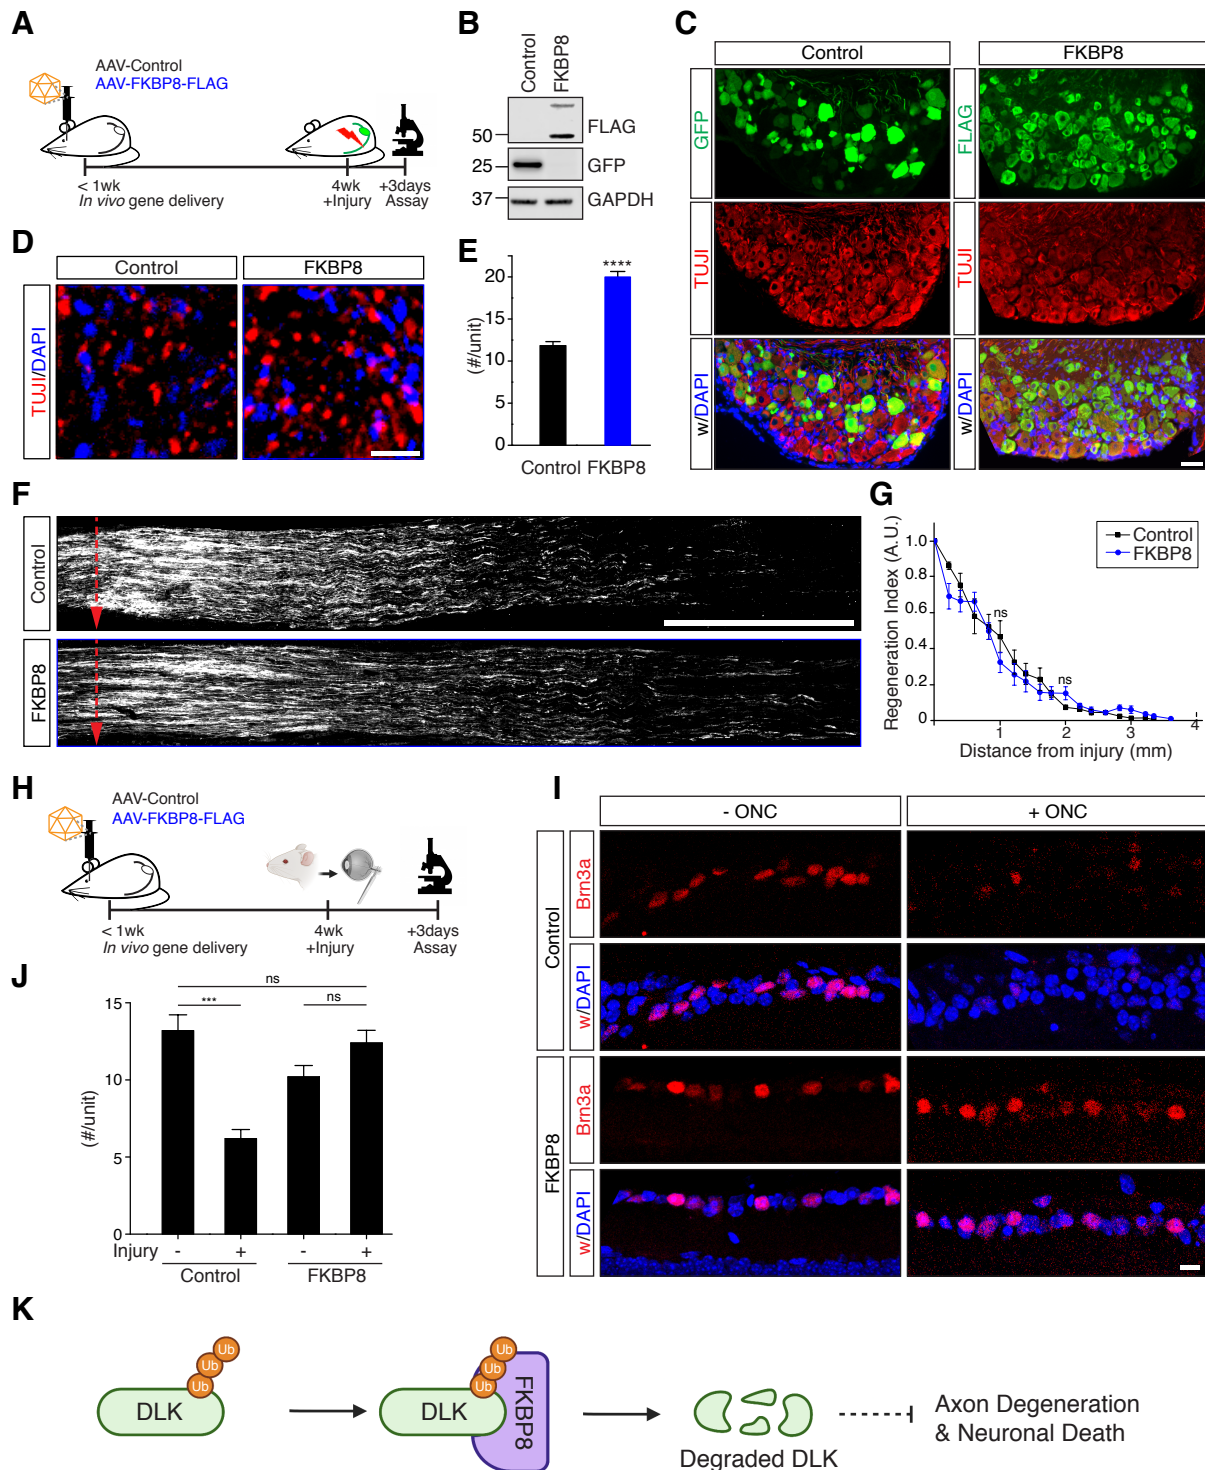

296

297 **Figure 6. In vivo gene delivery of FKBP8-delayed axon degeneration and enhanced viability of**

298 **RGC neurons.** (A) Experimental scheme for in vivo gene delivery used in in vivo axon regeneration

299 and degeneration assays for mouse sciatic nerves (wk, week). (B) Western blot analysis of GFP or

300 FKBP8 protein from DRG tissue dissected from AAV-injected mice. (C) Immunohistochemistry of

301 mouse DRG sections from AAV-injected mice, stained with anti-GFP for GFP injected mice and anti-  
302 FLAG for FKBP8 injected mice. Scale bar, 50 $\mu$ m. (D) In vivo degeneration assays for sciatic nerves.  
303 Representative cross-sections of the sciatic nerves from control or FKBP8-expressing mice. Scale bar,  
304 25  $\mu$ m. (E) Statistical analysis for (D) (n=3 for each condition; \*\*\*\*p $\leq$ 0.0001 from a *t*-test; mean  $\pm$  S.E.M.).  
305 (F) In vivo axon regeneration assays for sciatic nerves. Representative longitudinal sections of the  
306 sciatic nerves from control or FKBP8-expressing mice. The red dotted arrows indicate the injury site.  
307 Scale bar, 1 mm. (G) In vivo regeneration index from (F) (n=3 for the control, 6 for FKBP8; ns, not  
308 significant from a *t*-test; mean  $\pm$  S.E.M.). (H) Experimental scheme for in vivo gene delivery used in in  
309 vivo axon degeneration assays for mouse retinas (wk; week). (I) Representative longitudinal sections  
310 of the retinas from control or FKBP8-expressing mice. Scale bar, 10  $\mu$ m. (J) Quantification of the number  
311 of Brn3a-stained RGCs with or without injury (n=5 for each condition; \*\*\*p $<$ 0.001; ns, not significant  
312 from a *t*-test; mean  $\pm$  S.E.M.). (K) Schematic illustration of FKBP8-mediated DLK degradation.  
313

314 **Discussion**

315 DLK is a core protein responsible for injury-responses and directs neuronal fates under various  
316 types of stress conditions. Because DLK plays a role in both axon regeneration and degeneration,  
317 DLK has been referred to as a “double-edged sword” in the reconstruction of damaged neural tissue  
318 (Tedeschi & Bradke, 2013). Therefore, it is essential to determine the molecular mechanisms regulating  
319 DLK functions for understanding neuronal responses to stresses. In this study, we presented the DLK-  
320 interacting proteins FKBPL and FKBP8 as regulators of DLK degradation and DLK kinase activity.  
321 FKBPL and FKBP8 bound to the kinase domain of DLK and inhibited DLK kinase activity. In addition,  
322 FKBP8 induced the degradation of ubiquitinated DLK through lysosomal degradation pathways. In vivo  
323 gene delivery of FKBP8 delayed axon degeneration in sciatic nerves after axotomy and showed a  
324 protective effect against RGC death after an optic nerve crush injury, consistent with the suppression  
325 of DLK function that promotes axon degeneration and injury-induced neuronal death (references).

326 DLK protein levels are differentially regulated when neurons are subject to specific stimulations  
327 such as axotomy and microtubule stabilizing or destabilizing agents (Fernandes *et al*, 2014; Summers  
328 *et al*, 2020; Valakh *et al*, 2015; Jin & Zheng, 2019; Geden & Deshmukh, 2016; DiAntonio, 2019).  
329 Moreover, elevated levels of DLK proteins result in neuronal death in optic nerve injury models  
330 (Larhammar *et al*, 2017; Huntwork-Rodriguez *et al*, 2013). Therefore, detailing the molecular  
331 mechanisms for DLK protein turnover is important for understanding how the fates of neurons are  
332 determined in response to injury. Phr1 E3 ligase and the de-ubiquitinating enzyme USP9X are key  
333 players regulating DLK protein levels (Babetto *et al*, 2013). Here, we extend the knowledge about DLK  
334 protein degradation by identifying the specific lysine residue, lysine 271, responsible for ubiquitination  
335 in the kinase domain. Lysine 271 is also responsible for DLK sumoylation, indicating that this residue  
336 may be the site of competition between ubiquitination and sumoylation, which is a new finding in terms  
337 of DLK post-translational modifications and the mechanisms potentially regulating DLK functions. The  
338 lysine 271 site is required for ubiquitin-dependent DLK degradation via lysosomal functions. Therefore,  
339 the FKBPL- and FKBP8-mediated DLK protein degradation pathway with lysosomal autophagic  
340 functions provides a new direction for the manipulation of DLK protein levels in vivo under  
341 neuropathological and neurodegenerative conditions.

342

## 343 **Materials and Methods**

### 344 **Mice and surgical procedures**

345 CD-1: Crl:CD1(ICR) and C57BL/6J mice were used in the present study. All animal husbandry  
346 and surgical procedures were approved by the Korea University Institutional Animal Care & Use  
347 Committee (AU-IACUC). Surgery was performed under isoflurane anesthesia following regulatory  
348 protocols. Sciatic nerve injury experiments were performed as previously described (Cho *et al*, 2014).  
349 Briefly, anesthetized animals were subjected to unilateral exposure of the sciatic nerve at thigh level  
350 and a crush injury was inflicted with fine forceps for 10 s.

### 351 **Lentiviral constructs and AAV-mediated in vivo gene delivery**

352 Lentivirus-mediated gene delivery was used to knock down target mRNA from embryonic DRG  
353 neurons. Lentivirus was produced with Lenti-X packaging Single Shots (Takara, 631275) as previously  
354 described (Cho & Cavalli, 2012). For in vitro gene delivery, lentivirus was applied to embryonic DRG  
355 neuron cultures at DIV2. To knock down DLK in vitro, shRNA targeting sequences identified by the  
356 BROAD Institute (TRCN0000322150) were synthesized (Bionics) and ligated into a pLKO.1 lentiviral  
357 vector with the restriction sites AgeI/EcoRI. Lentivirus was produced using Lenti-XTM Packaging Single  
358 Shot (Qiagen, 631276), concentrated using a Lenti-XTM Concentrator (Qiagen, 631232), and quantified  
359 using a Lenti-XTM GoStix™ Plus kit (Qiagen, 631280) as previously described (Jeon *et al*, 2021). The  
360 efficiency of the knockdown process was confirmed using RT-qPCR. To deliver genes in vivo, 10 µl of  
361 adeno-associated virus (AAV, serotype 9)-encoding mouse Flag-tagged FKBP8 was injected into  
362 neonatal CD-1 mice (postnatal day 1) via a facial vein injection using a Hamilton syringe (Hamilton,  
363 1710 syringe with a 33G/0.75-inch small hub removable needle). The expression of GFP and the target  
364 genes in the sciatic nerve and DRGs was confirmed with immunoblot, immunohistochemistry, and RT-  
365 qPCR analysis.

### 366 **Yeast two-hybrid screening**

367 Yeast two-hybrid (Y2H) analysis was performed using a contract with Panbionet  
368 (<http://panbionet.com/>) as described previously. The bait was generated from mouse Map3k12 CDS  
369 (DLK, NM\_001163643, full length, 887 amino acids, 2,667) and cloned into XmaI/SalI sites of a pGBKT7  
370 vector with the primers 5'-CGC CCG GGG GCC TGC CTC CAT GAA ACC C-3' and 5'- GG CTC GAG  
371 TCA TGG AGG AAG GGA GGC T-3'. Various DLK baits were used to screen multiple cDNA libraries  
372 derived from mouse embryos.

### 373 **Antibodies and chemicals**

374 The following antibodies were used: anti-GFP (Santa Cruz, sc-9996 for co-  
375 immunoprecipitation; Abcam, ab32146 for immunoblots), anti-Flag HRP-conjugated (Sigma, A8592),  
376 anti-p-SEK1/MKK4 (Cell Signaling, CST-9151), anti-GST (Santa Cruz, sc-138), anti-alpha tubulin  
377 (Santa Cruz, sc-53030), anti-DLK (ThermoFisher Scientific, PA5-32173 for co-immunoprecipitation;  
378 Antibodies Incorporated, 75-355 for immunoblot), anti-p-SAPK/JNK (Cell Signaling, CST-9251S), anti-  
379 GAPDH (Santa Cruz, sc-32233), anti-p-cJun (Cell Signaling, CST-9251S), anti-LC3A/B (Cell Signaling,  
380 CST-12741), anti-SCG10 (Novus Biologicals, NBP1-49461), and anti-beta III tubulin (Abcam, ab41489).  
381 We dissolved all chemicals in DMSO (Sigma, D8418-250ML) and treated the controls with this vehicle  
382 except vincristine (Sigma, V8879), which was dissolved in methanol. We used vincristine at 200 nM,  
383 bafilomycin (Sigma, B1793) at 100 nM, caspase inhibitor (Sigma, 400012) at 1 and 5  $\mu$ M, pan-caspase  
384 inhibitor (R&D systems, FMK001) at 10 and 50  $\mu$ M, and MG-132 (Sigma, M7449) at 10  $\mu$ M.

### 385 **In vitro degeneration assays**

386 Embryonic DRGs were cultured in 12-well plates (SPL) coated with poly-d-lysine/laminin. For  
387 lentiviral transduction, lentivirus was added to the culture at DIV2. The culture medium was changed at  
388 DIV5, then vincristine and bafilomycin were added at DIV7. Within 48 hours, images were taken every  
389 12 hours for the degeneration assays. Axon degeneration was analyzed as described previously. Briefly,  
390 phase-contrast images were obtained using an inverted light microscope (CKX53; Olympus). Three  
391 non-overlapping images of each well were taken at each time point and were assessed for axon  
392 degeneration. Images were processed with the auto-level function in Photoshop (Adobe) for brightness  
393 adjustment. The images were then analyzed using a macro written in ImageJ to calculate the  
394 degeneration index (Araki *et al*, 2004; Shin *et al*, 2012; Miller *et al*, 2009). After the images were  
395 binarized, the total axon area was defined by the total number of detected pixels. The area of  
396 degenerated axon fragments was calculated using the particle analyzer function. To calculate the  
397 degeneration index, we divided the area covered by the axon fragments by the total axon area. The  
398 average of three images taken from the same well was used to calculate the mean degeneration index  
399 for each well.

### 400 **Optic nerve injury and retina tissue preparation**

401 To expose the optic nerve, the conjunctiva from the orbital region of the eye was cleared then  
402 the optic nerve was crushed for 3 seconds with Dumont #5 forceps (Fine Science Tools, 11254-20) with

403 special care taken not to damage the vein sinus. A saline solution was applied before and after the optic  
404 nerve crush injury to protect the eye from desiccation. Three days after injury, the mouse eyes were  
405 dissected and fixed via immersion in a 4% paraformaldehyde solution for 2 hours. After being washed  
406 three times in PBS, the eyes were transferred to 30% sucrose solution for 24 hours at 4°C. The optic  
407 nerves were then dissected out with micro-scissors (Fine Science Tools, 15070-08), sectioned at 15 µm  
408 in a cryostat, immunostained with Brn3a, and mounted in the mounting medium VectaShield (Vector  
409 Laboratories, H1000 or H1200).

#### 410 **Immunocytochemistry and immunohistochemistry**

411 Cultured neurons were fixed in 4% paraformaldehyde for 20 minutes at room temperature.  
412 Samples were washed with 0.1% Triton X100 in PBS (PBS-T) and immunostained using the same  
413 procedure described for the immunohistochemistry. To measure the axonal length, samples stained  
414 with anti-beta III tubulin antibody were imaged with an EVOS FL Auto 2 microscope and a Zeiss LSM  
415 800 confocal microscope. DRG and sciatic nerve tissues were fixed immediately after dissection in 4%  
416 paraformaldehyde for 1 hour at room temperature and immersed in 30% sucrose. Samples were  
417 cryopreserved in OCT medium (Tissue-Tek), cryo-sectioned at a thickness of 10 µm, and  
418 immunostained as described previously. Briefly, samples were blocked in blocking solution (5% normal  
419 goat serum and 0.1% Triton X-100 in PBS) for 1 hour and incubated with primary antibodies diluted in  
420 blocking solution overnight at 4°C. Samples were then rinsed twice with 0.1% Triton X100 in PBS (PBS-  
421 T), incubated with secondary antibodies for 1 hour at room temperature, rinsed three times with PBS-  
422 T, and mounted in VectaShield (Vector Laboratories, H1000 or H1200). The samples were imaged with  
423 an EVOS FL Auto 2 microscope (Thermo, AMAFD2000) or a Zeiss LSM800.

#### 424 **In vivo axon regeneration assays**

425 To examine axon regeneration in sciatic nerves, sciatic nerves were dissected three days after  
426 the crush injury and dissected, sectioned, and immunostained with TUJ1 and anti-SCG10 antibodies.  
427 Immunostained sections were imaged with an EVOS FL Auto 2 Imaging System (Thermo,  
428 AMAFD2000), which automatically combined the individual images. The fluorescence intensity of  
429 SCG10 was measured along the length of the nerve section using ImageJ software. A regeneration  
430 index was calculated by measuring the average SCG10 intensity from the injury site to the distal side  
431 normalized to the intensity at the crush site and presented as a regeneration index.

#### 432 **In vivo degeneration assays**



433 For the axon degeneration assays, the sciatic nerves of FKBP8 overexpressed mice were  
434 dissected three days after the crush injury and dissected and immunostained with TUJ1 antibody.  
435 Immunostained sections were imaged with an EVOS FL Auto 2 Imaging System and a Zeiss LSM800.  
436 We quantified the unfragmented axons in the distal nerve and compared these between FKBP8-  
437 overexpressed nerves and the control.

#### 438 **Western blot analysis and co-immunoprecipitation assays**

439 To study protein–protein interactions, plasmids containing mouse DLK and mouse Flag-tagged  
440 FKBPL/FKBP8 were transfected into HEK293T cells using Lipofectamine 2000 (Thermo, 11668-019)  
441 following the manufacturer's instructions. Cell lysates were prepared in 1X SDS buffer (63 mM Tris pH  
442 6.8, 2% SDS, 10% glycerol) then boiled for 10 minutes at 95°C. After centrifugation, the protein  
443 concentration in the supernatant was determined using DC protein assays (Bio-rad, 5000116) with  
444 bovine serum albumin solutions as standards. Equal amounts of protein were loaded into 1x MOPS  
445 running buffer for SDS-PAGE and transferred to a nitrocellulose membrane. The membranes were  
446 blocked with 5% skim milk dissolved in 1x TBS with 0.1% Tween-20 (TBS-T) for 1 hour, incubated with  
447 primary antibodies overnight at 4°C, and washed three times with TBS-T. The blots were then incubated  
448 with secondary antibodies for 1 hour and washed three times with TBS-T. Protein expression levels  
449 were analyzed with enhanced chemiluminescence using Odyssey (Li-Cor).

450 DLK and Flag-tagged FKBPL/FKBP8 transfected HEK293T cells were lysated in IP buffer (0.5%  
451 NP40, 150 mM NaCl, 20 mM Tris-HCl pH 7.5) containing a protease inhibitor cocktail (Roche). GFP-  
452 DLK was immunoprecipitated with anti-GFP antibody pre-bound to Dynabeads Protein A (Thermo,  
453 10001D) from input lysates for 16 hours at 4°C. The precipitants were washed four times using  
454 DynaMag-2 (Thermo, 12321D) and subjected to SDS-PAGE for western blot analysis.

#### 455 **In vitro kinase assays**

456 DLK kinase activity was assessed as described previously (Holland *et al*, 2016). HEK293T  
457 cells were transfected with GFP-tagged DLK or FLAG-tagged FKBPL individually using Lipofectamine  
458 2000 (Thermo, 11668-019). Cell lysates were prepared in immunoprecipitation buffer (50 mM HEPES,  
459 pH 7.5, 150 mM NaCl, 1 mM EGTA, 0.1% Triton X-100) containing a protease inhibitor cocktail (Roche,  
460 11836153001). GFP-DLK was immunopurified using anti-GFP antibody with Dynabeads Protein G  
461 (ThermoFisher Scientific, 10007D). The substrate GST-MKK4 was purified following a previous protocol  
462 (Holland *et al*, 2016). Complexes were incubated for 30 min at 30 °C in 30 µl of kinase buffer (25 mM

463 HEPES, pH 7.2, 10% glycerol, 100 mM NaCl, 20 mM MgCl<sub>2</sub>, 0.1 mM sodium vanadate, and protease  
464 inhibitors) containing 25 μM ATP and 2 μg of GST or GST-MKK4. Reactions were terminated by the  
465 addition of Laemmli buffer, boiled, resolved using SDS-PAGE, and subjected to western blot analysis  
466 with anti-phospho-MKK4 antibody.

467

#### 468 **Acknowledgements**

469 This work was supported by a National Research Foundation of Korea (NRF) grant funded by  
470 the Korean government (MSIT) (NRF-2019R1A2C1005380 to Y.C, 2016R1A5A2007009 and  
471 2020R1C1C1011074 to J.E.S.) and by a Korea University grant.

472

#### 473 **Author contributions**

474 Conceptualization, B.L., J.E.S., A.D., V.C. and Y.C.; Methodology, Formal Analysis, and  
475 Investigation, B.L., Y.O., E.C., J.E.S. and Y.C.; Resources, Funding Acquisition, Y.C. and J.E.S;  
476 Supervision and Project Administration, J.E.S., A.D., V.C. and Y.C.; Data Curation and Visualization,  
477 B.L. and Y.C.; Writing – Original Draft, B.L. and Y.C.; Writing – Review & Editing, B.L., J.E.S., A.D., V.C.,  
478 and Y.C.

479

#### 480 **Conflict of interest**

481 The authors have no conflicts of interest to declare.

482

#### 483 **Data Availability Section**

484 All data is available in the main text.

485

486 **References**

- 487 Araki T, Sasaki Y & Milbrandt J (2004) Increased nuclear NAD biosynthesis and SIRT1  
488 activation prevent axonal degeneration. *Science* 305: 1010–1013
- 489 Asghari Adib E, Smithson LJ & Collins CA (2018) An axonal stress response pathway:  
490 degenerative and regenerative signaling by DLK. *Curr Opin Neurobiol* 53: 110–119
- 491 Babetto E, Beirowski B, Russler E V., Milbrandt J & DiAntonio A (2013) The Phr1  
492 Ubiquitin Ligase Promotes Injury-Induced Axon Self-Destruction. *Cell Rep* 3: 1422–  
493 1429
- 494 Bhujabal Z, Birgisdottir ÁB, Sjøttem E, Brenne HB, Øvervatn A, Habisov S, Kirkin V,  
495 Lamark T & Johansen T (2017) FKBP8 recruits LC3A to mediate Parkin-independent  
496 mitophagy. *EMBO Rep* 18: 947–961
- 497 Chen X, Rzhetskaya M, Kareva T, Bland R, During MJ, Tank AW, Kholodilov N & Burke  
498 RE (2008) Antiapoptotic and trophic effects of dominant-negative forms of dual leucine  
499 zipper kinase in dopamine neurons of the substantia nigra in vivo. *J Neurosci* 28: 672–  
500 680
- 501 Cho Y & Cavalli V (2012) HDAC5 is a novel injury-regulated tubulin deacetylase  
502 controlling axon regeneration. *EMBO J* 31: 3063–3078
- 503 Cho Y, Di Liberto V, Carlin D, Abe N, Li KH, Burlingame AL, Guan S, Michaelevski I &  
504 Cavalli V (2014) Syntaxin13 expression is regulated by mammalian target of rapamycin  
505 (mTOR) in injured neurons to promote axon regeneration. *J Biol Chem* 289: 15820–  
506 15832
- 507 Cho Y, Sloutsky R, Naegle KM & Cavalli V (2013) Injury-Induced HDAC5 nuclear export is  
508 essential for axon regeneration. *Cell* 155: 894–908

- 509 Collins CA, Wairkar YP, Johnson SL & DiAntonio A (2006) Highwire restrains synaptic  
510 growth by attenuating a MAP kinase signal. *Neuron* 51: 57–69
- 511 DiAntonio A (2019) Axon degeneration: mechanistic insights lead to therapeutic  
512 opportunities for the prevention and treatment of peripheral neuropathy. *Pain* 160: S17–  
513 S22
- 514 Fan G, Merritt SE, Kortenjann M, Shaw PE & Holzman LB (1996) Dual leucine zipper-  
515 bearing kinase (DLK) activates p46(SAPK) and p38(mapk) but not ERK2. *J Biol Chem*  
516 271: 24788–24793
- 517 Fernandes KA, Harder JM, John SW, Shrager P & Libby RT (2014) DLK-dependent  
518 signaling is important for somal but not axonal degeneration of retinal ganglion cells  
519 following axonal injury. *Neurobiol Dis* 69: 108–116
- 520 Frey E, Valakh V, Karney-Grobe S, Shi Y, Milbrandt J & DiAntonio A (2015) An in vitro  
521 assay to study induction of the regenerative state in sensory neurons. *Exp Neurol* 263:  
522 350–363
- 523 Geden MJ & Deshmukh M (2016) Axon degeneration: Context defines distinct pathways.  
524 *Curr Opin Neurobiol* 39: 108–115
- 525 Geisler S, Doan RA, Strickland A, Huang X, Milbrandt J & DiAntonio A (2016) Prevention  
526 of vincristine-induced peripheral neuropathy by genetic deletion of SARM1 in mice.  
527 *Brain* 139: 3092–3108
- 528 Ghartey-Kwansah G, Li Z, Feng R, Wang L, Zhou X, Chen FZ, Xu MM, Jones O, Mu Y,  
529 Chen S, *et al* (2018) Comparative analysis of FKBP family protein: evaluation,  
530 structure, and function in mammals and *Drosophila melanogaster*. *BMC Dev Biol* 18: 7
- 531 Ghosh AS, Wang B, Pozniak CD, Chen M, Watts RJ & Lewcock JW (2011) DLK induces

- 532 developmental neuronal degeneration via selective regulation of proapoptotic JNK  
533 activity. *J Cell Biol* 194: 751–764
- 534 Heitman J, Movva NR & Hall MN (1992) Proline isomerases at the crossroads of protein  
535 folding, signal transduction, and immunosuppression. *New Biol* 4: 448–460
- 536 Hirai SI, De FC, Miyata T, Ogawa M, Kiyonari H, Suda Y, Aizawa S, Banba Y & Ohno S  
537 (2006) The c-Jun N-terminal kinase activator dual leucine zipper kinase regulates axon  
538 growth and neuronal migration in the developing cerebral cortex. *J Neurosci* 26: 11992–  
539 12002
- 540 Holland SM, Collura KM, Ketschek A, Noma K, Ferguson TA, Jin Y, Gallo G & Thomas  
541 GM (2016a) Palmitoylation controls DLK localization, interactions and activity to  
542 ensure effective axonal injury signaling. *Proc Natl Acad Sci U S A* 113: 763–768
- 543 Holland SM, Collura KM, Ketschek A, Noma K, Ferguson TA, Jin Y, Gallo G & Thomas  
544 GM (2016b) Palmitoylation controls DLK localization, interactions and activity to  
545 ensure effective axonal injury signaling. *Proc Natl Acad Sci* 113: 763 LP – 768
- 546 Huntwork-Rodriguez S, Wang B, Watkins T, Ghosh AS, Pozniak CD, Bustos D, Newton K,  
547 Kirkpatrick DS & Lewcock JW (2013) JNK-mediated phosphorylation of DLK  
548 suppresses its ubiquitination to promote neuronal apoptosis. *J Cell Biol* 202: 747–763
- 549 Jeon Y, Shin JE, Kwon M, Cho E, Cavalli V & Cho Y (2020) In Vivo Gene Delivery of  
550 STC2 Promotes Axon Regeneration in Sciatic Nerves. *Mol Neurobiol*
- 551 Jin Y & Zheng B (2019) Multitasking: Dual leucine zipper-bearing kinases in neuronal  
552 development and stress management. *Annu Rev Cell Dev Biol* 35: 501–521
- 553 Kang CB, Hong Y, Dhe-Paganon S & Yoon HS (2008) FKBP family proteins:  
554 immunophilins with versatile biological functions. *Neurosignals* 16: 318–325

- 555 Larhammar M, Huntwork-Rodriguez S, Jiang Z, Solanoy H, Ghosh AS, Wang B, Kaminker  
556 JS, Huang K, Eastham-Anderson J, Siu M, *et al* (2017) Dual leucine zipper kinase-  
557 dependent PERK activation contributes to neuronal degeneration following insult. *Elife*  
558 6: 1–27
- 559 Lee B, Lee J, Jeon Y, Kim H, Kwon M, Shin JE & Cho Y (2021) Promoting axon  
560 regeneration by enhancing the non-coding function of the injury-responsive coding gene  
561 *Gpr151*. *bioRxiv*: 2021.02.19.431965
- 562 Lim GG & Lim K-L (2017) Parkin-independent mitophagy-FKBP8 takes the stage. *EMBO*  
563 *Rep* 18: 864–865
- 564 Martin DDO, Kanuparthi PS, Holland SM, Sanders SS, Jeong HK, Einarson MB, Jacobson  
565 MA & Thomas GM (2019) Identification of Novel Inhibitors of DLK Palmitoylation  
566 and Signaling by High Content Screening. *Sci Rep* 9: 1–12
- 567 Miller BR, Press C, Daniels RW, Sasaki Y, Milbrandt J & Diantonio A (2009) A dual leucine  
568 kinase-dependent axon self-destruction program promotes Wallerian degeneration. *Nat*  
569 *Neurosci* 12: 387–389
- 570 Misaka T, Murakawa T, Nishida K, Omori Y, Taneike M, Omiya S, Molenaar C, Uno Y,  
571 Yamaguchi O, Takeda J, *et al* (2018) FKBP8 protects the heart from hemodynamic  
572 stress by preventing the accumulation of misfolded proteins and endoplasmic reticulum-  
573 associated apoptosis in mice. *J Mol Cell Cardiol* 114: 93–104
- 574 Montersino A & Thomas GM (2015) Slippery signaling: Palmitoylation-dependent control of  
575 neuronal kinase localization and activity. *Mol Membr Biol* 32: 179–188
- 576 Nakata K, Abrams B, Grill B, Goncharov A, Huang X, Chisholm AD & Jin Y (2005)  
577 Regulation of a DLK-1 and p38 MAP kinase pathway by the ubiquitin ligase RPM-1 is

- 578 required for presynaptic development. *Cell* 120: 407–420
- 579 Niu J, Sanders SS, Jeong HK, Holland SM, Sun Y, Collura KM, Hernandez LM, Huang H,  
580 Hayden MR, Smith GM, *et al* (2020) Coupled Control of Distal Axon Integrity and  
581 Somal Responses to Axonal Damage by the Palmitoyl Acyltransferase ZDHHC17. *Cell*  
582 *Rep* 33: 108365
- 583 Ren J, Gao X, Jin C, Zhu M, Wang X, Shaw A, Wen L, Yao X & Xue Y (2009) Systematic  
584 study of protein sumoylation: Development of a site-specific predictor of SUMOsp 2.0.  
585 *Proteomics* 9: 3409–3412
- 586 Schmid FX, Mayr LM, Mücke M & Schönbrunner ER (1993) Prolyl isomerases: role in  
587 protein folding. *Adv Protein Chem* 44: 25–66
- 588 Shin JE, Cho Y, Beirowski B, Milbrandt J, Cavalli V & DiAntonio A (2012a) Dual Leucine  
589 Zipper Kinase Is Required for Retrograde Injury Signaling and Axonal Regeneration.  
590 *Neuron* 74: 1015–1022
- 591 Shin JE, Ha H, Cho EH, Kim YK & Cho Y (2018) Comparative analysis of the transcriptome  
592 of injured nerve segments reveals spatiotemporal responses to neural damage in mice. *J*  
593 *Comp Neurol*
- 594 Shin JE, Ha H, Kim YK, Cho Y & DiAntonio A (2019) DLK regulates a distinctive  
595 transcriptional regeneration program after peripheral nerve injury. *Neurobiol Dis* 127:  
596 178–192
- 597 Shin JE, Miller BR, Babetto E, Cho Y, Sasaki Y, Qayum S, Russler E V, Cavalli V,  
598 Milbrandt J & DiAntonio A (2012b) SCG10 is a JNK target in the axonal degeneration  
599 pathway. *Proc Natl Acad Sci U S A* 109: E3696-705
- 600 Summers DW, Frey E, Walker LJ, Milbrandt J & DiAntonio A (2020) DLK Activation

- 601 Synergizes with Mitochondrial Dysfunction to Downregulate Axon Survival Factors and  
602 Promote SARM1-Dependent Axon Degeneration. *Mol Neurobiol* 57: 1146–1158
- 603 Tedeschi A & Bradke F (2013a) The DLK signalling pathway - A double-edged sword in  
604 neural development and regeneration. *EMBO Rep* 14: 605–614
- 605 Tedeschi A & Bradke F (2013b) The DLK signalling pathway - A double-edged sword in  
606 neural development and regeneration. *EMBO Rep* 14: 605–614
- 607 Tong M & Jiang Y (2015) FK506-Binding Proteins and Their Diverse Functions. *Curr Mol*  
608 *Pharmacol* 9: 48–65
- 609 Valakh V, Frey E, Babetto E, Walker LJ & DiAntonio A (2015a) Cytoskeletal disruption  
610 activates the DLK/JNK pathway, which promotes axonal regeneration and mimics a  
611 preconditioning injury. *Neurobiol Dis* 77: 13–25
- 612 Valakh V, Frey E, Babetto E, Walker LJ & DiAntonio A (2015b) Cytoskeletal disruption  
613 activates the DLK/JNK pathway, which promotes axonal regeneration and mimics a  
614 preconditioning injury. *Neurobiol Dis* 77: 13–25
- 615 Watkins TA, Wang B, Huntwork-Rodriguez S, Yang J, Jiang Z, Eastham-Anderson J,  
616 Modrusan Z, Kaminker JS, Tessier-Lavigne M & Lewcock JW (2013) DLK initiates a  
617 transcriptional program that couples apoptotic and regenerative responses to axonal  
618 injury. *Proc Natl Acad Sci U S A* 110: 4039–4044
- 619 Welsbie DS, Schirok H, Mitchell K, Koch M, Kim B-J, Lobell M, Patel AK, Holton S,  
620 Hristodorov D, Esteve-Rudd J, *et al* (2018) Identification of a retinal neuroprotective  
621 kinase inhibitor with preferential activity against DLK compared to LZK. *Invest*  
622 *Ophthalmol Vis Sci* 59: 2493
- 623 Yoo S-M, Yamashita S, Kim H, Na D, Lee H, Kim SJ, Cho D-H, Kanki T & Jung Y-K



- 624 (2020) FKBP8 LIRL-dependent mitochondrial fragmentation facilitates mitophagy  
625 under stress conditions. *FASEB J* 34: 2944–2957
- 626 Zhao Q, Xie Y, Zheng Y, Jiang S, Liu W, Mu W, Liu Z, Zhao Y, Xue Y & Ren J (2014)  
627 GPS-SUMO: a tool for the prediction of sumoylation sites and SUMO-interaction  
628 motifs. *Nucleic Acids Res* 42: W325–W330
